# Supplementary material for: Flexible ICU visitation improves caregiver experience: a two-phase intervention study in an Australian Quaternary Centre
Source: Research Square preprint supplement (doi:10.21203/rs.3.rs-7169408/v1), 2025-09-23
Supplement: Supplementary file 1 [file 15cde52cb865789f74c9c672.pdf]

## Impact of Orange Dot Policy (Flexible Visitation) in ICU on Healthcare Staff

Q1. What is your role in the ICU?

| Answer Choices             | Response Percent | Responses |
|----------------------------|------------------|-----------|
| Nurse                      | 77.21%           | 105       |
| Doctor                     | 20.59%           | 28        |
| Allied Health Professional | 2.21%            | 3         |
|                            | Answered         | 136       |
|                            | Skipped          | 0         |

Q2. Are you aware of the orange dot policy allowing for flexible visitation in extenuating circumstances?

| Answer Choices | Response Percent | Responses |
|----------------|------------------|-----------|
| Yes            | 100.00%          | 136       |
| No             | 0.00%            | 0         |
|                | Answered         | 136       |
|                | Skipped          | 0         |

Q3. Which of the following aspects of flexible visitation do you think may be beneficial? Select all that apply.

| Answer Choices                | Response Percent | Responses |
|-------------------------------|------------------|-----------|
| Improved patient morale       | 74.81%           | 101       |
| Enhanced family communication | 80.00%           | 108       |
| Better patient outcomes       | 45.93%           | 62        |
| Reduced patient anxiety       | 75.56%           | 102       |
| None of the above             | 5.93%            | 8         |
| Other (please specify)        | 18.52%           | 25        |
|                               | Answered         | 135       |
|                               | Skipped          | 1         |

Q4. Which of the following challenges have you experienced with flexible visitation? Select all that apply.

| Answer Choices                | Response Percent | Responses |
|-------------------------------|------------------|-----------|
| Increased noise levels        | 29.63%           | 40        |
| Disruptions to care routines  | 71.85%           | 97        |
| Higher stress levels          | 31.11%           | 42        |
| More difficult to manage time | 45.93%           | 62        |
| None of the above             | 18.52%           | 25        |
| Other (please specify)        | 31.11%           | 42        |
|                               | Answered         | 135       |
|                               | Skipped          | 1         |

Q5. How has flexible visitation impacted your workload?

| Answer Choices          | Response Percent | Responses |
|-------------------------|------------------|-----------|
| Increased significantly | 15.44%           | 21        |
| Increased slightly      | 47.79%           | 65        |
| No change               | 33.09%           | 45        |

|                         |       |     |
|-------------------------|-------|-----|
| Decreased slightly      | 3.68% | 5   |
| Decreased significantly | 0.00% | 0   |
| Answered                |       | 136 |
| Skipped                 |       | 0   |

Q6. Do you feel that flexible visitation has improved patient outcomes?

| Answer Choices    | Response Percent | Responses |
|-------------------|------------------|-----------|
| Strongly agree    | 9.56%            | 13        |
| Agree             | 43.38%           | 59        |
| Neutral           | 34.56%           | 47        |
| Disagree          | 10.29%           | 14        |
| Strongly disagree | 2.21%            | 3         |
| Answered          |                  | 136       |
| Skipped           |                  | 0         |

Q7. Can you describe a specific instance where flexible visitation had a positive impact on patient care?

|          |    |
|----------|----|
| Answered | 96 |
| Skipped  | 40 |

Q8. Can you describe a specific instance where flexible visitation had a negative impact on patient care?

|          |     |
|----------|-----|
| Answered | 103 |
| Skipped  | 33  |

Q9. Overall, how satisfied are you with the current flexible visitation policy?

| Answer Choices    | Response Percent | Responses |
|-------------------|------------------|-----------|
| Very satisfied    | 13.97%           | 19        |
| Satisfied         | 44.85%           | 61        |
| Neutral           | 26.47%           | 36        |
| Dissatisfied      | 11.03%           | 15        |
| Very dissatisfied | 3.68%            | 5         |
| Answered          |                  | 136       |
| Skipped           |                  | 0         |

Q10. Do you believe that flexible visitation policies should be continued in the ICU?

| Answer Choices | Response Percent | Responses |
|----------------|------------------|-----------|
| Yes            | 73.68%           | 98        |
| No             | 9.77%            | 13        |
| Unsure         | 16.54%           | 22        |
| Answered       |                  | 133       |
| Skipped        |                  | 3         |

Q11. What suggestions do you have for improving the flexible visitation policy?

|          |    |
|----------|----|
| Answered | 76 |
| Skipped  | 60 |

Q12. Please provide any additional comments or feedback regarding flexible visitation in the ICU.

|          |    |
|----------|----|
| Answered | 50 |
| Skipped  | 86 |
